# Supplementary material for: Metabolically Improved Stem Cell Derived Hepatocyte-Like Cells Support HBV Life Cycle and Are a Promising Tool for HBV Studies and Antiviral Drug Screenings
Source: MDPI journal article supplement (doi:10.3390/biomedicines10020268), 2022-01-26
Supplement: s1 [file s1]

# Supplementary Material

## Metabolically Improved Stem Cell Derived Hepatocyte-Like Cells Support HBV Life Cycle and Are a Promising Tool for HBV Studies and Antiviral Drug Screenings

Tine Tricot <sup>1,\*†</sup>, Hendrik Jan Thibaut <sup>2,3,\*†</sup>, Kayvan Abbasi <sup>2</sup>, Ruben Boon <sup>1,4</sup>, Nicky Helsen <sup>1,5</sup>, Manoj Kumar <sup>1</sup>, Johan Neyts <sup>2†</sup> and Catherine Verfaillie <sup>1,\*†</sup>

<sup>1</sup> Stem Cell Institute, Rega Institute KU Leuven, 3000 Leuven, Belgium; ruben.boon@kuleuven.be (R.B.); nicky.helsen@ismar.com (N.H.); manoj.kumar@kuleuven.be (M.K.)

<sup>2</sup> Department of Microbiology, Immunology and Transplantation, Virology and Chemotherapy, Rega Institute KU Leuven, 3000 Leuven, Belgium; kayvan.abbasi@kuleuven.be (K.A.); johan.neyts@kuleuven.be (J.N.)

<sup>3</sup> Department of Microbiology, Immunology and Transplantation, Translational Platform Virology and Chemotherapy (TPVC), Rega Institute KU Leuven, 3000 Leuven, Belgium

<sup>4</sup> Laboratory for Functional Epigenetics, Department of Human Genetics, Rega Institute KU Leuven, 3000 Leuven, Belgium

<sup>5</sup> Ismar Healthcare NV, 2500 Lier, Belgium

\* Correspondence: tine.tricot@kuleuven.be (T.T.); Hendrikjan.thibaut@kuleuven.be (H.J.T.); catherine.verfaillie@kuleuven.be (C.V.); Tel.: +32-16-37-71-09 (T.T.); +32-16-32-16-82 (H.J.T.); +32-16-37-26-54 (C.V.)

† These authors contributed equally to this work.

### Supplementary

Table.....1

### Supplementary

Figures.....2

## Supplementary Tables

**Table S1.** Primer list.

| GENE         | FORWARD PRIMER                | REVERSE PRIMER                |
|--------------|-------------------------------|-------------------------------|
| <i>RPL19</i> | <b>ATTGGTCTCATTGGGGTCTAAC</b> | <b>AGTATGCTCAGGCTTCAGAAGA</b> |
| <i>ALB</i>   | <b>ATGCTGAGGCAAAGGATGTC</b>   | <b>AGCAGCAGCACGACAGAGTA</b>   |
| <i>AAT</i>   | <b>AGGGCCTGAAGCTAGTGGAT</b>   | <b>TCCTCGGTGTCCTTGACTTC</b>   |
| <i>HNF4</i>  | <b>ACTACGGTGCCTCGAGCTGT</b>   | <b>GGCACTGGTTCCTCTTGTCT</b>   |
| <i>NTCP</i>  | <b>ATCGTCCTCAAATCCAAACG</b>   | <b>CCACATTGATGGCAGAGAGA</b>   |

**Table S2.** Antibody list.

| ANTIBODY                        | CATALOG NUMBER           | COMPANY              | DILUTION                                                                 |
|---------------------------------|--------------------------|----------------------|--------------------------------------------------------------------------|
| HNF4                            | <b>Ab41898</b>           | <b>Abcam</b>         | <b>1:200</b>                                                             |
| NTCP                            | <b>HPA042727</b>         | <b>Sigma-Aldrich</b> | <b>1:500</b>                                                             |
| HBcAg                           | <b>B0586</b>             | <b>Dako</b>          | <b>1:750</b>                                                             |
| HBsAg                           | <b>SAB 4700767-100UG</b> | <b>Sigma-Aldrich</b> | <b>1:500</b>                                                             |
| ALEXA 555 DONKEY<br>ANTI-RABBIT | <b>Thermo Fisher</b>     | <b>A31572</b>        | <b>1:500</b>                                                             |
| ALEXA 488 DONKEY<br>ANTI-RABBIT | <b>Thermo Fisher</b>     | <b>A21206</b>        | <b>1:500</b>                                                             |
| ALEXA 555 DONKEY<br>ANTI-MOUSE  | <b>Thermo Fisher</b>     | <b>A31570</b>        | <b>1:500</b>                                                             |
| ALEXA 488 DONKEY<br>ANTI-MOUSE  | <b>Thermo Fisher</b>     | <b>A21202</b>        | <b>1:500</b>                                                             |
| ISOTYPE RABBIT IgG              | <b>BD Pharmingen</b>     | <b>550875</b>        | <b>Used as control in same<br/>concentration as primary<br/>antibody</b> |
| ISOTYPE MOUSE<br>IgG2a          | <b>Sigma-Aldrich</b>     | <b>M9144-1MG</b>     | <b>Used as control in same<br/>concentration as primary<br/>antibody</b> |

## Supplementary Figures

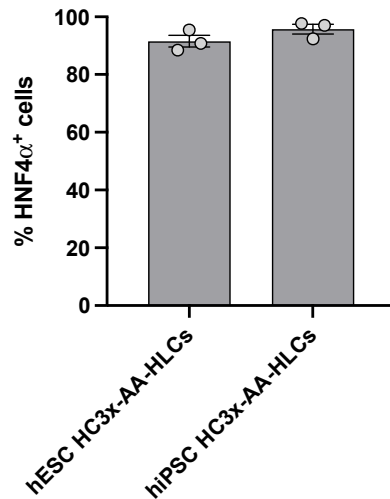

**Figure S1. Purity of the hESC and hiPSC HC3x-AA-HLC differentiation.** Quantification of immunofluorescence staining for HNF4 $\alpha$ <sup>+</sup> hESC and hiPSC HC3x-AA-HLCs. All data is shown as mean  $\pm$  SEM.

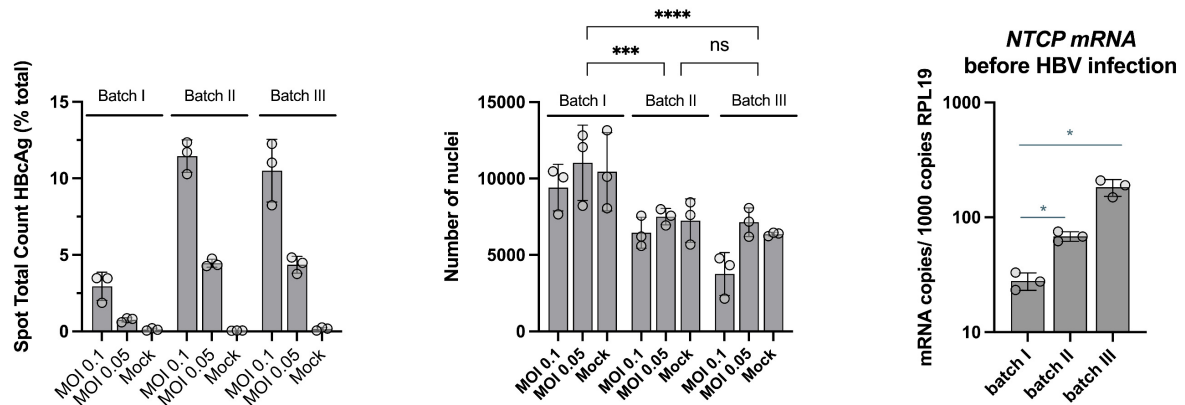

**Figure S2. Variability in HBV infection efficiency is possibly caused by differences in cell density and NTCP expression levels.** Quantification of immunofluorescence staining for HBcAg and cell number in mock and HBV-infected HC3x-AA-HLCs (MOI 0.1 and 0.05), as well as gene expression analysis for NTCP in 3 different experiments. RPL19 was used for normalization. All data is shown as mean  $\pm$  SEM.
